# Supplementary material for: Yeast EndoG prevents genome instability by degrading cytoplasmic DNA
Source: Research Square preprint supplement (doi:10.21203/rs.3.rs-3641411/v1), 2024-01-05
Supplement: Supplementary file 1 [file 2dc67d25c687a062e6868846.xlsx]

## Sheet: Table S1
Supplementary Table 1. Frequency and types of DNA insertions
							donor					frequency per 104 cells
strain name	genotype	growth condition	number of colonies	number of colonies normalized by HO cut (n)	all insertions	complex insertions	mtDNA	Ty DNA	all nuclear DNA	rDNA	nuclear w/o rDNA	all insertions	mtDNA	Ty DNA	all nuclear DNA	rDNA	nuclear w/o rDNA
JKM139	WT	growing cells	102976	101711	8	0	0	3	5	2	3	0.786541	0	0.294953	0.48555	0.19422	0.294953
yYY363	nuc1	growing cells	25560	24412.7	2	0	0	2	0	0	0	0.819245	0	0.819245	0	0	0
yWH475	dna2 pif1-m2	growing cells	197264	178507	3966	250	0	255	3963	625	3338	222.177	0	14.2852	200.898	31.6834	186.996
JKM139	WT	1 day stationary phase	147120	144177	141	14	7	115	32	5	27	9.77964	0.485514	7.9763	2.1751	0.339859	1.8727
JKM139	WT	2 day stationary phase	119040	118248	1017	75	391	620	79	14	65	86.006	33.0662	52.4323	6.63642	1.17608	5.49694
JKM139	WT	3 day stationary phase	183904	182733	1857	99	1008	794	147	23	124	101.624	55.1625	43.4514	7.9933	1.25065	6.78586
JKM139	WT	8 day stationary phase	247224	245316	3689	206	2538	745	589	80	509	150.377	103.458	30.369	23.8245	3.23593	20.7487
JKM139	WT	16 day stationary phase	81124	80432.8	2756	149	1476	214	1188	78	1110	342.646	183.507	26.606	146.442	9.61491	138.003
JKM139 *	WT	16 day stationary phase	~540000	~535756	30200	3732	24091	961	9019	989	8030	~563.7	~449.7	~17.9	~168.3	~18.5	~149.9
yYY363	nuc1	3 day stationary phase	108912	108221	4727	580	11	5153	168	13	155	436.79	1.01643	476.153	15.4253	1.19362	14.3225
yYY363	nuc1	8 day stationary phase	140160	139084	4571	543	118	4724	293	21	272	328.65	8.48408	339.651	20.9047	1.49829	19.5565
yYY363	nuc1	16 day stationary phase	113472	112260	3151	287	389	2267	736	42	694	280.687	34.6517	201.942	64.8618	3.70135	61.8207
yYY661	nuc1-H138A	8 day stationary phase	126000	124443	2370	140	117	2167	192	28	164	190.448	9.40189	174.136	15.2381	2.22222	13.1787
yYY337	sch9	8 day stationary phase	40720	40251.4	619	44	543	38	75	12	63	153.784	134.902	9.44067	18.4185	2.94695	15.6516
yYY387	pol32	8 day stationary phase	13020	12812.7	244	7	201	33	13	0	13	190.436	156.876	25.7557	9.98464	0	10.1462
yYY466	rad51	8 day stationary phase	36720	35997.8	670	35	574	66	56	15	41	186.123	159.454	18.3345	15.2505	4.08497	11.3896
yYY399	lig4	8 day stationary phase	10200	206.894	2	1	2	1	0	0	0	96.6678	96.6678	48.3339	0	0	0
yYY400	pol4	8 day stationary phase	20880	17289.8	75	1	12	42	10	1	9	43.3782	6.94051	24.2918	4.78927	0.478927	5.20538
JKM139	WT	young cells	33760	32214.5	10	0	0	4	4	2	2	3.10419	0	1.24168	1.18483	0.592417	0.620838
JKM139	WT	aged cells	69693	66747	375	15	119	36	231	190	41	56.1823	17.8285	5.3935	33.1454	27.2624	6.1426
yYY363	nuc1	aged cells	33055	32375.7	224	19	39	48	155	113	42	69.1876	12.0461	14.8259	46.8915	34.1854	12.9727
* Indicates experiment where the number of colonies pooled together was large and not counted precisely. This experiment was not used to calculate the frequencies of insertion per NHEJ product.
